# Supplementary material for: Pocillopora spp. growth analysis on restoration structures in an Eastern Tropical Pacific upwelling area
Source: PeerJ. 2022 Jun 23;10:e13248. doi: 10.7717/peerj.13248 (PMC9233897; doi:10.7717/peerj.13248)
Supplement: Supplemental Information 1 [file peerj-10-13248-s001.xlsx]

## Sheet: Monitoring
structure	fragment	month	length	width	area
A	1	Jan	2.533	1.527	1.968
A	2	Jan	3.069	1.079	2.155
A	3	Jan	2.277	2.167	2.185
A	4	Jan	2.032	0.888	1.196
A	5	Jan	2.463	2.067	1.802
A	6	Jan	2.562	2.27	3.124
A	7	Jan	2.287	1.43	2.451
A	8	Jan	2.561	2.199	1.868
A	9	Jan	2.062	1.26	1.414
A	10	Jan	3.099	1.471	3.312
A	11	Jan	2.939	2.468	4.136
A	12	Jan	2.177	1.615	1.672
A	13	Jan	2.893	2.527	3.107
A	14	Jan	2.442	2.789	3.469
A	15	Jan	2.747	0.929	1.773
A	16	Jan	3.282	3.035	3.398
A	17	Jan	2.665	2.475	2.639
A	18	Jan	2.594	1.094	2.358
A	19	Jan	1.866	1.937	1.583
A	20	Jan	1.847	2.647	2.389
A	21	Jan	2.517	0.849	1.685
A	22	Jan	2.504	1.208	2.408
A	23	Jan	2.368	2.197	2.711
A	24	Jan	2.419	1.245	1.975
A	25	Jan	2.988	2.286	2.889
A	26	Jan	3.068	1.353	3.02
A	27	Jan	3.035	1.478	2.271
A	28	Jan	2.116	1.852	1.754
A	29	Jan	2.525	1.499	1.985
A	30	Jan	2.975	0.955	1.815
A	31	Jan	3.304	1.768	3.376
A	32	Jan	2.608	2.234	3.368
A	33	Jan	2.791	1.578	3.011
A	34	Jan	2.948	2.309	3.437
A	35	Jan	2.343	1.701	2.763
A	36	Jan	1.913	1.417	1.325
A	37	Jan	2.403	2.306	2.294
A	38	Jan	2.141	1.299	1.687
A	39	Jan	2.702	1.639	2.28
A	40	Jan	2.832	2.117	3.116
A	41	Jan	2.972	1.052	1.882
A	42	Jan	2.198	2.495	2.036
B	1	Jan	5.47	2.209	7.096
B	2	Jan	5.273	2.048	4.838
B	3	Jan	6.392	2.816	8.959
B	4	Jan	4.968	2.167	6.615
B	5	Jan	7.081	3.736	16.64
B	6	Jan	3.726	2.365	3.882
B	7	Jan	5.43	3.436	7.061
B	8	Jan	5.171	1.817	6.248
B	9	Jan	4.695	4.076	11.111
B	10	Jan	4.781	1.504	4.118
B	11	Jan	5.607	3.314	7.996
B	12	Jan	4.048	2.382	4.964
B	13	Jan	4.944	2.159	5.001
B	14	Jan	5.608	3.099	9.725
B	15	Jan	6.126	4.165	13.032
B	16	Jan	6.171	4.71	10.39
B	17	Jan	6.389	3.609	12.488
B	18	Jan	5.382	3.841	10.199
B	19	Jan	6.36	2.82	9.879
B	20	Jan	5	2.453	7.653
B	21	Jan	6.086	2.234	8.985
B	22	Jan	4.669	3.359	5.582
B	23	Jan	4.862	3.236	7.876
B	24	Jan	5.319	2.865	8.314
B	25	Jan	5.44	4.714	10.55
B	26	Jan	5.502	1.946	5.847
B	27	Jan	5.942	4.616	13.843
B	28	Jan	5.686	5.423	12.921
B	29	Jan	5.604	4.609	9.296
B	30	Jan	6.541	4.253	9.37
B	31	Jan	3.632	2.704	5.337
B	32	Jan	4.447	3.833	5.061
B	33	Jan	5.568	5.772	15.893
B	34	Jan	6.33	1.929	8.509
B	35	Jan	5.367	3.821	8.946
B	36	Jan	4.212	3.269	6.773
B	37	Jan	4.727	3.639	8.792
B	38	Jan	6.372	2.062	8.046
B	39	Jan	5.22	2.222	7.112
B	40	Jan	4.74	2.61	6.699
B	41	Jan	4.933	3.065	6.58
B	42	Jan	4.76	2.772	5.94
C	1	Jan	7.744	4.124	14.849
C	2	Jan	8.213	7.411	27.986
C	3	Jan	9.531	3.965	22.611
C	4	Jan	9.761	4.858	24.583
C	5	Jan	8.34	5.556	18.617
C	6	Jan	7.838	3.873	14.279
C	7	Jan	9.275	7.166	31.653
C	8	Jan	7.614	4.417	16.703
C	9	Jan	5.25	3.797	10.306
C	10	Jan	9.44	6.316	23.626
C	11	Jan	7.799	7.694	24.84
C	12	Jan	9.694	4.239	17.99
C	13	Jan	6.989	3.936	13.427
C	14	Jan	8.928	3.039	16.911
C	15	Jan	7.393	4.142	14.441
C	16	Jan	8.984	5.641	20.982
C	17	Jan	6.407	3.133	8.525
C	18	Jan	9.102	4.036	13.921
C	19	Jan	10.187	6.653	25.193
C	20	Jan	8.71	6.347	21.238
C	21	Jan	6.686	3.583	12.272
C	22	Jan	5.12	2.112	7.105
C	23	Jan	9.749	6.942	41.901
C	24	Jan	7.615	5.483	17.007
C	25	Jan	12.174	10.014	57.157
C	26	Jan	3.987	7.333	16.194
C	27	Jan	8.895	6.88	24.401
C	28	Jan	10.04	3.708	19.024
C	29	Jan	8.725	8.055	27.547
C	30	Jan	8.426	1.821	11.456
C	31	Jan	5.999	1.893	8.021
C	32	Jan	8.554	4.518	18.325
C	33	Jan	8.026	5.18	16.842
C	34	Jan	8.196	2.659	14.791
C	35	Jan	7.662	4.362	22.351
C	36	Jan	#N/A	#N/A	#N/A
C	37	Jan	9.979	5.506	25.862
C	38	Jan	11.834	6.292	32.567
C	39	Jan	7.094	6.119	27.953
C	40	Jan	7.625	4.964	18.22
C	41	Jan	7.465	2.586	15.324
C	42	Jan	7.722	5.141	19.7
A	1	Feb	2.679	1.697	2.237
A	2	Feb	3.465	1.189	2.321
A	3	Feb	2.098	1.958	1.657
A	4	Feb	#N/A	#N/A	#N/A
A	5	Feb	1.108	0.487	0.44
A	6	Feb	#N/A	#N/A	#N/A
A	7	Feb	2.839	2.143	3.818
A	8	Feb	2.835	2.851	2.779
A	9	Feb	2.219	2.261	2.282
A	10	Feb	3.541	1.894	4.423
A	11	Feb	3.494	2.687	4.894
A	12	Feb	#N/A	#N/A	#N/A
A	13	Feb	3.077	2.135	2.829
A	14	Feb	2.846	2.596	3.442
A	15	Feb	2.871	1.125	2.093
A	16	Feb	#N/A	#N/A	#N/A
A	17	Feb	2.65	2.387	2.714
A	18	Feb	2.324	0.898	1.569
A	19	Feb	2.101	1.869	1.456
A	20	Feb	#N/A	#N/A	#N/A
A	21	Feb	2.61	0.915	1.706
A	22	Feb	2.765	1.167	2.73
A	23	Feb	2.643	2.137	2.404
A	24	Feb	#N/A	#N/A	#N/A
A	25	Feb	3.211	2.491	3.167
A	26	Feb	3.443	2.005	3.595
A	27	Feb	3.089	2.116	2.692
A	28	Feb	2.185	1.944	1.857
A	29	Feb	2.699	1.055	1.476
A	30	Feb	3.116	1.427	2.493
A	31	Feb	3.363	1.855	3.824
A	32	Feb	2.844	2.508	3.663
A	33	Feb	#N/A	#N/A	#N/A
A	34	Feb	2.987	2.32	3.136
A	35	Feb	2.324	1.377	1.956
A	36	Feb	1.77	1.431	1.027
A	37	Feb	#N/A	#N/A	#N/A
A	38	Feb	#N/A	#N/A	#N/A
A	39	Feb	2.719	1.008	1.779
A	40	Feb	3.304	2.235	4.029
A	41	Feb	3.242	1.335	2.02
A	42	Feb	2.294	2.672	2.317
B	1	Feb	5.647	2.421	8.218
B	2	Feb	5.629	2.333	5.489
B	3	Feb	6.873	3.103	13.266
B	4	Feb	#N/A	#N/A	#N/A
B	5	Feb	7.309	4.167	17.7
B	6	Feb	#N/A	#N/A	#N/A
B	7	Feb	#N/A	#N/A	#N/A
B	8	Feb	5.683	1.945	6.764
B	9	Feb	5.041	4.152	11.946
B	10	Feb	4.525	2.086	4.144
B	11	Feb	5.204	3.631	10.405
B	12	Feb	4.501	2.408	6.335
B	13	Feb	4.626	2.353	5.261
B	14	Feb	6.139	4.676	13.609
B	15	Feb	6.063	4.508	15.24
B	16	Feb	6.735	6.246	13.901
B	17	Feb	6.432	5.782	14.527
B	18	Feb	5.48	4.929	14.274
B	19	Feb	4.472	3.28	7.992
B	20	Feb	4.638	2.123	6.705
B	21	Feb	6.441	2.358	7.892
B	22	Feb	4.097	3.143	4.714
B	23	Feb	6.105	4.413	12.431
B	24	Feb	5.862	3.306	10.627
B	25	Feb	6.123	4.871	13.055
B	26	Feb	4.719	2.145	4.453
B	27	Feb	6.438	4.813	15.774
B	28	Feb	6.157	5.282	18.288
B	29	Feb	5.57	3.661	10.176
B	30	Feb	7.294	4.147	12.296
B	31	Feb	4.299	3.574	8.881
B	32	Feb	3.939	3.594	4.546
B	33	Feb	6.22	5.949	17.336
B	34	Feb	5.539	1.841	6.979
B	35	Feb	5.692	3.613	9.877
B	36	Feb	4.926	3.079	9.772
B	37	Feb	4.603	4.02	8.73
B	38	Feb	6.848	2.831	10.118
B	39	Feb	5.298	1.886	6.194
B	40	Feb	5.437	2.431	7.046
B	41	Feb	#N/A	#N/A	#N/A
B	42	Feb	3.507	2.229	6.217
C	1	Feb	#N/A	#N/A	#N/A
C	2	Feb	8.878	5.964	20.953
C	3	Feb	9.715	5.058	27.674
C	4	Feb	8.633	5.531	30.621
C	5	Feb	#N/A	#N/A	#N/A
C	6	Feb	7.947	4.061	19.185
C	7	Feb	10.202	7.287	33.572
C	8	Feb	9.095	4.636	22.781
C	9	Feb	#N/A	#N/A	#N/A
C	10	Feb	10.477	5.644	38.673
C	11	Feb	7.601	5.766	19.83
C	12	Feb	10.133	4.98	24.094
C	13	Feb	7.223	4.653	15.557
C	14	Feb	9.026	4.837	19.43
C	15	Feb	7.173	4.964	18.168
C	16	Feb	10.129	6.374	31.438
C	17	Feb	7.035	4.353	15.387
C	18	Feb	9.089	3.841	19.262
C	19	Feb	9.726	7.027	32.316
C	20	Feb	7.507	5.946	22.226
C	21	Feb	7.672	3.004	15.004
C	22	Feb	4.988	2.793	7.402
C	23	Feb	10.848	6.592	43.495
C	24	Feb	8.375	6.415	20.249
C	25	Feb	13.26	10.195	60.937
C	26	Feb	8.082	4.904	21.441
C	27	Feb	5.573	5.275	11.572
C	28	Feb	9.507	3.172	17.004
C	29	Feb	8.75	9.512	28.593
C	30	Feb	8.67	2.476	13.678
C	31	Feb	8.758	2.791	15.571
C	32	Feb	8.154	4.217	14.994
C	33	Feb	8.38	6.682	32.023
C	34	Feb	8.41	2.759	11.785
C	35	Feb	7.93	5.094	20.701
C	36	Feb	10.934	8.988	42.019
C	37	Feb	9.073	5.29	27.728
C	38	Feb	10.119	6.07	31.436
C	39	Feb	#N/A	#N/A	#N/A
C	40	Feb	5.964	6.089	18.606
C	41	Feb	8.18	3.501	16.271
C	42	Feb	7.01	5.713	19.247
A	1	Apr	2.62	1.903	2.183
A	2	Apr	4.871	1.479	3.969
A	3	Apr	2.618	2.55	3.075
A	4	Apr	#N/A	#N/A	#N/A
A	5	Apr	#N/A	#N/A	#N/A
A	6	Apr	#N/A	#N/A	#N/A
A	7	Apr	3.734	2.738	5.799
A	8	Apr	3.479	2.472	4.688
A	9	Apr	3.148	3.037	5.2
A	10	Apr	4.667	2.273	6.632
A	11	Apr	3.018	2.883	4.427
A	12	Apr	#N/A	#N/A	#N/A
A	13	Apr	3.93	3.225	5.931
A	14	Apr	4.119	3.845	6.103
A	15	Apr	4.073	2.073	4.658
A	16	Apr	#N/A	#N/A	#N/A
A	17	Apr	3.164	3.089	4.249
A	18	Apr	3.293	1.795	3.06
A	19	Apr	2.942	2.488	3.316
A	20	Apr	#N/A	#N/A	#N/A
A	21	Apr	3.584	1.751	3.271
A	22	Apr	3.641	2.02	4.874
A	23	Apr	#N/A	#N/A	#N/A
A	24	Apr	#N/A	#N/A	#N/A
A	25	Apr	4.073	3.341	6.163
A	26	Apr	3.563	1.939	3.003
A	27	Apr	4.128	2.562	6.313
A	28	Apr	3.271	2.427	3.988
A	29	Apr	3.08	1.196	1.802
A	30	Apr	3.701	1.656	3.42
A	31	Apr	4.814	2.485	5.416
A	32	Apr	3.502	2.659	5.386
A	33	Apr	#N/A	#N/A	#N/A
A	34	Apr	2.312	1.703	2.705
A	35	Apr	3.691	1.609	3.501
A	36	Apr	1.327	1.164	1.097
A	37	Apr	#N/A	#N/A	#N/A
A	38	Apr	#N/A	#N/A	#N/A
A	39	Apr	#N/A	#N/A	#N/A
A	40	Apr	4.587	3.199	7.144
A	41	Apr	3.078	2.612	4.435
A	42	Apr	#N/A	#N/A	#N/A
B	1	Apr	6.284	2.628	8.446
B	2	Apr	5.997	2.83	7.936
B	3	Apr	8.023	3.65	15.512
B	4	Apr	#N/A	#N/A	#N/A
B	5	Apr	6.564	4.186	16.99
B	6	Apr	#N/A	#N/A	#N/A
B	7	Apr	#N/A	#N/A	#N/A
B	8	Apr	6.026	2.553	8.337
B	9	Apr	6.686	5.288	20.043
B	10	Apr	4.08	1.793	4.06
B	11	Apr	5.588	3.231	11.35
B	12	Apr	5.776	3.537	11.386
B	13	Apr	5.853	4.541	12.35
B	14	Apr	7.44	4.919	22.317
B	15	Apr	6.274	4.27	14.306
B	16	Apr	7.3	6.833	22.535
B	17	Apr	7.633	5.266	22.115
B	18	Apr	6.066	5.484	17.358
B	19	Apr	5.995	4.639	17.478
B	20	Apr	5.501	2.491	9.134
B	21	Apr	7.382	3.286	11.766
B	22	Apr	5.11	4.117	10.595
B	23	Apr	6.828	3.989	11.857
B	24	Apr	6.67	3.832	15.762
B	25	Apr	7.07	6.153	19.995
B	26	Apr	6.426	3.36	11.888
B	27	Apr	7.471	5.723	28.345
B	28	Apr	6.877	6.217	27.088
B	29	Apr	6.035	4.538	16.071
B	30	Apr	6.492	3.602	13.108
B	31	Apr	5.989	4.822	16.567
B	32	Apr	#N/A	#N/A	#N/A
B	33	Apr	7.272	6.489	26.629
B	34	Apr	6.788	2.801	11.776
B	35	Apr	6.609	4.34	16.126
B	36	Apr	6.341	4.772	19.58
B	37	Apr	5.81	4.092	12.537
B	38	Apr	7.42	3.25	13.627
B	39	Apr	5.278	2.255	7.322
B	40	Apr	6.808	4.158	15.685
B	41	Apr	#N/A	#N/A	#N/A
B	42	Apr	5.439	3.86	10.696
C	1	Apr	#N/A	#N/A	#N/A
C	2	Apr	9.048	5.479	30.593
C	3	Apr	10.503	6.636	43.849
C	4	Apr	9.512	8.218	34.166
C	5	Apr	#N/A	#N/A	#N/A
C	6	Apr	8.947	5.271	29.598
C	7	Apr	10.081	7.993	33.542
C	8	Apr	10.328	6.177	36.921
C	9	Apr	#N/A	#N/A	#N/A
C	10	Apr	9.378	6.226	39.54
C	11	Apr	#N/A	#N/A	#N/A
C	12	Apr	9.304	5.043	26.931
C	13	Apr	7.766	5.684	29.027
C	14	Apr	9.268	4.512	27.769
C	15	Apr	7.308	3.781	17.146
C	16	Apr	10.666	8.155	43
C	17	Apr	7.284	5.302	19.007
C	18	Apr	9.587	5.151	31.505
C	19	Apr	11.1	8.285	49.162
C	20	Apr	7.508	7.174	31.86
C	21	Apr	8.844	3.427	21.487
C	22	Apr	6.177	3.211	13.035
C	23	Apr	10.645	7.865	46.274
C	24	Apr	9.079	6.336	25.239
C	25	Apr	14.425	10.801	75.289
C	26	Apr	9.008	6.257	32.91
C	27	Apr	8.736	5.803	22.22
C	28	Apr	#N/A	#N/A	#N/A
C	29	Apr	8.779	6.589	28.607
C	30	Apr	9.197	3.218	16.955
C	31	Apr	7.296	3.74	14.779
C	32	Apr	6.999	3.036	11.303
C	33	Apr	8.427	6.657	33.541
C	34	Apr	9.079	3.591	14.584
C	35	Apr	9.472	6.141	33.972
C	36	Apr	11.674	11.045	69.02
C	37	Apr	9.659	7.133	39.781
C	38	Apr	10.704	7.452	41.528
C	39	Apr	#N/A	#N/A	#N/A
C	40	Apr	6.927	5.84	18.44
C	41	Apr	9.286	3.558	20.02
C	42	Apr	6.301	4.571	17.378
A	1	May	3.503	3.077	4.977
A	2	May	2.702	2.001	2.37
A	3	May	2.75	1.343	2.339
A	4	May	#N/A	#N/A	#N/A
A	5	May	#N/A	#N/A	#N/A
A	6	May	#N/A	#N/A	#N/A
A	7	May	4.503	2.704	8.369
A	8	May	4.068	3.318	4.879
A	9	May	3.563	3.143	6.135
A	10	May	5.196	2.866	10.312
A	11	May	4.305	2.841	8.648
A	12	May	#N/A	#N/A	#N/A
A	13	May	4.253	3.723	7.438
A	14	May	5.349	4.338	13.112
A	15	May	4.288	3.02	6.673
A	16	May	#N/A	#N/A	#N/A
A	17	May	4.231	3.769	7.895
A	18	May	4.411	2.521	7.028
A	19	May	3.044	2.618	3.347
A	20	May	#N/A	#N/A	#N/A
A	21	May	4.36	2.502	6.651
A	22	May	4.048	2.212	6.322
A	23	May	3.454	3.119	4.207
A	24	May	#N/A	#N/A	#N/A
A	25	May	3.334	2.988	6.274
A	26	May	2.005	2.004	1.959
A	27	May	#N/A	#N/A	#N/A
A	28	May	#N/A	#N/A	#N/A
A	29	May	3.626	2.227	3.977
A	30	May	4.501	1.491	3.874
A	31	May	4.973	2.858	6.906
A	32	May	4.681	3.194	8.407
A	33	May	1.676	0.782	0.769
A	34	May	3.358	1.725	3.594
A	35	May	4.228	1.881	5.209
A	36	May	1.386	1.114	1.039
A	37	May	#N/A	#N/A	#N/A
A	38	May	#N/A	#N/A	#N/A
A	39	May	#N/A	#N/A	#N/A
A	40	May	3.715	3.203	6.252
A	41	May	#N/A	#N/A	#N/A
A	42	May	3.554	3.271	4.713
B	1	May	6.92	3.076	12.238
B	2	May	6.388	2.652	10.395
B	3	May	9.185	4.074	25.185
B	4	May	#N/A	#N/A	#N/A
B	5	May	8.218	4.282	23.565
B	6	May	#N/A	#N/A	#N/A
B	7	May	#N/A	#N/A	#N/A
B	8	May	6.451	3.11	10
B	9	May	7.158	3.486	18.1
B	10	May	5.224	2.431	7.183
B	11	May	6.845	4.763	20.795
B	12	May	6.521	3.169	12.639
B	13	May	6.377	4.496	14.575
B	14	May	7.814	4.779	26.931
B	15	May	7.295	4.852	22.065
B	16	May	7.344	6.005	24.091
B	17	May	7.093	4.731	16.706
B	18	May	6.978	6.06	21.103
B	19	May	5.333	4.995	17.786
B	20	May	5.401	2.911	10.933
B	21	May	6.809	3.509	11.001
B	22	May	5.551	5.405	16.991
B	23	May	#N/A	#N/A	#N/A
B	24	May	7.245	4.038	18.403
B	25	May	6.326	5.298	19.892
B	26	May	6.896	3.542	12.916
B	27	May	6.49	5.296	22.64
B	28	May	7.73	6.947	31.213
B	29	May	7.039	5.416	19.25
B	30	May	6.542	4.459	15.133
B	31	May	6.467	4.74	19.302
B	32	May	#N/A	#N/A	#N/A
B	33	May	7.591	5.969	28.467
B	34	May	6.526	2.44	11.884
B	35	May	6.596	4.646	18.586
B	36	May	6.679	5.21	19.347
B	37	May	5.953	4.64	14.369
B	38	May	7.036	3.228	12.031
B	39	May	6.375	2.782	12.55
B	40	May	#N/A	#N/A	#N/A
B	41	May	#N/A	#N/A	#N/A
B	42	May	5.655	3.716	13.533
C	1	May	#N/A	#N/A	#N/A
C	2	May	8.883	6.14	27.669
C	3	May	9.748	8.374	51.371
C	4	May	10.817	6.125	43.898
C	5	May	#N/A	#N/A	#N/A
C	6	May	9.007	5.576	33.307
C	7	May	10.582	7.965	42.162
C	8	May	11.726	6.836	47.058
C	9	May	#N/A	#N/A	#N/A
C	10	May	9.6	8.381	52.331
C	11	May	#N/A	#N/A	#N/A
C	12	May	10.211	4.2	29.639
C	13	May	4.915	5.082	17.114
C	14	May	11.568	5.837	42.427
C	15	May	8.775	5.944	33.264
C	16	May	10.794	7.935	42.791
C	17	May	6.739	5.499	24.544
C	18	May	8.561	5.944	32.544
C	19	May	#N/A	#N/A	#N/A
C	20	May	8.432	6.021	32.373
C	21	May	10.145	6.276	35.996
C	22	May	8.46	4.385	19.527
C	23	May	10.118	6.595	48.973
C	24	May	9.166	5.249	28.131
C	25	May	15.354	10.074	80.959
C	26	May	8.084	6.597	31.379
C	27	May	9.055	6.166	25.074
C	28	May	10.023	8.544	48.055
C	29	May	9.5	3.528	19.442
C	30	May	#N/A	#N/A	#N/A
C	31	May	7.685	4.52	19.718
C	32	May	9.314	5.543	22.363
C	33	May	6.971	5.937	27.036
C	34	May	#N/A	#N/A	#N/A
C	35	May	8.91	6.772	34.964
C	36	May	11.05	8.159	52.625
C	37	May	8.234	6.129	34.138
C	38	May	#N/A	#N/A	#N/A
C	39	May	#N/A	#N/A	#N/A
C	40	May	#N/A	#N/A	#N/A
C	41	May	#N/A	#N/A	#N/A
C	42	May	#N/A	#N/A	#N/A
A	1	June	#N/A	#N/A	#N/A
A	2	June	2.695	1.927	2.887
A	3	June	3.192	2.333	3.664
A	4	June	#N/A	#N/A	#N/A
A	5	June	#N/A	#N/A	#N/A
A	6	June	#N/A	#N/A	#N/A
A	7	June	5.429	3.689	13.77
A	8	June	4.983	3.783	9.473
A	9	June	4.264	3.226	8.577
A	10	June	6.19	3.738	15.597
A	11	June	5.889	3.972	16.144
A	12	June	#N/A	#N/A	#N/A
A	13	June	5.16	5.111	14.127
A	14	June	6.309	6.103	19.856
A	15	June	5.356	3.462	9.513
A	16	June	#N/A	#N/A	#N/A
A	17	June	#N/A	#N/A	#N/A
A	18	June	4.191	2.649	6.511
A	19	June	3.834	2.897	4.205
A	20	June	#N/A	#N/A	#N/A
A	21	June	4.322	2.637	8.532
A	22	June	4.863	3.06	9.884
A	23	June	3.839	3.464	6.368
A	24	June	#N/A	#N/A	#N/A
A	25	June	4.455	4.129	9.319
A	26	June	2.657	2.054	2.168
A	27	June	#N/A	#N/A	#N/A
A	28	June	#N/A	#N/A	#N/A
A	29	June	3.136	1.928	2.436
A	30	June	4.713	2.232	6.569
A	31	June	4.889	2.813	7.721
A	32	June	4.613	3.451	8.621
A	33	June	1.897	0.864	1.197
A	34	June	3.934	1.902	4.065
A	35	June	#N/A	#N/A	#N/A
A	36	June	#N/A	#N/A	#N/A
A	37	June	#N/A	#N/A	#N/A
A	38	June	#N/A	#N/A	#N/A
A	39	June	5.297	3.773	12.698
A	40	June	4.502	4.033	8.885
A	41	June	#N/A	#N/A	#N/A
A	42	June	3.874	3.378	6.01
B	1	June	8.096	4.899	21.749
B	2	June	6.506	2.86	13.354
B	3	June	9.791	4.796	28.621
B	4	June	#N/A	#N/A	#N/A
B	5	June	9.045	5.806	33.009
B	6	June	#N/A	#N/A	#N/A
B	7	June	#N/A	#N/A	#N/A
B	8	June	4.312	2.07	5.262
B	9	June	8.951	6.082	33.695
B	10	June	5.432	2.991	8.938
B	11	June	5.123	3.402	10.704
B	12	June	#N/A	#N/A	#N/A
B	13	June	8.243	5.131	21.166
B	14	June	9.22	7.392	43.473
B	15	June	8.197	6.026	29.913
B	16	June	9.928	7.992	43.329
B	17	June	9.111	6.226	31.957
B	18	June	7.702	7.495	30.702
B	19	June	#N/A	#N/A	#N/A
B	20	June	5.888	3.463	11.962
B	21	June	8.744	4.539	26.748
B	22	June	6.744	6.257	22.917
B	23	June	#N/A	#N/A	#N/A
B	24	June	9.161	6.404	39.338
B	25	June	8.645	5.973	25.284
B	26	June	7.677	4.52	18.493
B	27	June	8.814	5.665	34.26
B	28	June	9.35	9.131	54.977
B	29	June	#N/A	#N/A	#N/A
B	30	June	#N/A	#N/A	#N/A
B	31	June	#N/A	#N/A	#N/A
B	32	June	#N/A	#N/A	#N/A
B	33	June	6.851	5.922	25.623
B	34	June	8.194	3.214	18.407
B	35	June	8.958	5.934	32.119
B	36	June	#N/A	#N/A	#N/A
B	37	June	7.948	5.644	26.947
B	38	June	6.32	2.615	8.922
B	39	June	#N/A	#N/A	#N/A
B	40	June	7.735	3.923	17.043
B	41	June	#N/A	#N/A	#N/A
B	42	June	8.479	5.137	24.516
C	1	June	#N/A	#N/A	#N/A
C	2	June	9.333	5.609	28.295
C	3	June	12.517	8.552	70.691
C	4	June	12.064	7.395	63.246
C	5	June	#N/A	#N/A	#N/A
C	6	June	10.006	8.127	42.01
C	7	June	12.146	9.3	65.003
C	8	June	12.675	8.685	64.181
C	9	June	#N/A	#N/A	#N/A
C	10	June	10.427	9.473	59.657
C	11	June	#N/A	#N/A	#N/A
C	12	June	12.358	7.354	52.458
C	13	June	7.11	5.929	22.808
C	14	June	10.735	5.269	36.325
C	15	June	9.334	7.169	41.015
C	16	June	10.414	9.798	61.45
C	17	June	7.868	6.759	32.204
C	18	June	9.871	7.172	39.258
C	19	June	#N/A	#N/A	#N/A
C	20	June	10.352	7.808	44.524
C	21	June	9.42	4.072	25.809
C	22	June	7.972	4.919	19.229
C	23	June	11.831	8.373	63.914
C	24	June	10.34	6.215	32.025
C	25	June	12.458	9.923	61.559
C	26	June	9.281	6.542	35.091
C	27	June	5.824	6.627	23.727
C	28	June	10.794	9.2	55.341
C	29	June	10.016	3.952	22.583
C	30	June	#N/A	#N/A	#N/A
C	31	June	8.918	3.643	19.359
C	32	June	9.376	6.082	25.817
C	33	June	7.571	5.692	23.955
C	34	June	4.589	3.626	5.494
C	35	June	9.78	8.921	42.694
C	36	June	13.639	9.946	79.345
C	37	June	11.084	7.255	53.538
C	38	June	#N/A	#N/A	#N/A
C	39	June	#N/A	#N/A	#N/A
C	40	June	7.248	7.059	27.492
C	41	June	10.262	4.297	25.635
C	42	June	5.965	5.905	21.628
A	1	July	#N/A	#N/A	#N/A
A	2	July	3.087	2.752	5.33
A	3	July	3.757	3.335	7.115
A	4	July	#N/A	#N/A	#N/A
A	5	July	#N/A	#N/A	#N/A
A	6	July	#N/A	#N/A	#N/A
A	7	July	6.28	5.185	18.794
A	8	July	6.081	3.685	15.886
A	9	July	4.742	4.474	12.257
A	10	July	6.275	3.986	19.56
A	11	July	6.998	4.75	22.7
A	12	July	#N/A	#N/A	#N/A
A	13	July	5.07	4.515	12.016
A	14	July	7.77	6.456	29.98
A	15	July	5.769	4.001	12.913
A	16	July	#N/A	#N/A	#N/A
A	17	July	#N/A	#N/A	#N/A
A	18	July	4.937	3.477	10.979
A	19	July	5.016	2.637	7.776
A	20	July	#N/A	#N/A	#N/A
A	21	July	5.252	3.226	11.119
A	22	July	5.677	3.861	15.71
A	23	July	5.527	4.193	10.378
A	24	July	#N/A	#N/A	#N/A
A	25	July	5.509	5.891	18.545
A	26	July	2.451	2.211	2.686
A	27	July	#N/A	#N/A	#N/A
A	28	July	#N/A	#N/A	#N/A
A	29	July	3.732	1.997	4.372
A	30	July	5.9	2.749	4.372
A	31	July	6.511	4.331	15.945
A	32	July	6.056	6.944	21.602
A	33	July	2.532	1.475	2.277
A	34	July	4.095	2.343	5.967
A	35	July	5.545	3.446	13.428
A	36	July	#N/A	#N/A	#N/A
A	37	July	#N/A	#N/A	#N/A
A	38	July	#N/A	#N/A	#N/A
A	39	July	#N/A	#N/A	#N/A
A	40	July	5.724	3.525	11.516
A	41	July	#N/A	#N/A	#N/A
A	42	July	#N/A	#N/A	#N/A
B	1	July	8.612	5.281	26.512
B	2	July	8.902	5.415	32.397
B	3	July	9.765	6.025	42.569
B	4	July	#N/A	#N/A	#N/A
B	5	July	10.693	7.36	56.514
B	6	July	#N/A	#N/A	#N/A
B	7	July	#N/A	#N/A	#N/A
B	8	July	6.028	2.195	6.583
B	9	July	9.157	6.078	33.931
B	10	July	7.272	5.113	19.936
B	11	July	8.971	5.843	37.817
B	12	July	6.751	4.648	19.578
B	13	July	7.592	5.798	20.792
B	14	July	8.231	6.397	36.339
B	15	July	11.524	8.258	63.206
B	16	July	9.882	7.159	50.099
B	17	July	6.227	6.015	18.877
B	18	July	#N/A	#N/A	#N/A
B	19	July	#N/A	#N/A	#N/A
B	20	July	8.847	4.943	27.87
B	21	July	9.902	5.5	40.659
B	22	July	8.29	7.263	39.269
B	23	July	#N/A	#N/A	#N/A
B	24	July	10.402	7.375	43.306
B	25	July	8.557	7.533	35.093
B	26	July	8.344	5.708	28.522
B	27	July	7.749	5.313	28.522
B	28	July	9.968	8.453	53.968
B	29	July	#N/A	#N/A	#N/A
B	30	July	#N/A	#N/A	#N/A
B	31	July	#N/A	#N/A	#N/A
B	32	July	#N/A	#N/A	#N/A
B	33	July	9.162	8.836	53.1
B	34	July	8.912	5.79	29.103
B	35	July	10.043	7.264	50.135
B	36	July	#N/A	#N/A	#N/A
B	37	July	9.259	7.509	36.327
B	38	July	8.618	4.4	22.076
B	39	July	#N/A	#N/A	#N/A
B	40	July	8.889	5.845	26.776
B	41	July	#N/A	#N/A	#N/A
B	42	July	7.385	4.483	20.141
C	1	July	#N/A	#N/A	#N/A
C	2	July	9.9	6.913	36.584
C	3	July	5.43	4.601	14.435
C	4	July	12.978	8.381	71.757
C	5	July	#N/A	#N/A	#N/A
C	6	July	5.963	5.382	15.032
C	7	July	12.718	9.954	61.344
C	8	July	12.38	8.424	62.337
C	9	July	#N/A	#N/A	#N/A
C	10	July	13.052	9.995	83.579
C	11	July	#N/A	#N/A	#N/A
C	12	July	12.638	7.645	60.359
C	13	July	9.194	5.595	29.297
C	14	July	9.594	6.357	35.325
C	15	July	11.612	7.143	58.088
C	16	July	12.489	5.059	35.416
C	17	July	10.08	9.354	62.355
C	18	July	#N/A	#N/A	#N/A
C	19	July	#N/A	#N/A	#N/A
C	20	July	11.375	10.443	63.379
C	21	July	11.355	7.334	49.574
C	22	July	8.546	5.366	26.715
C	23	July	11.331	8.129	64.08
C	24	July	10.042	6.581	33.056
C	25	July	14.87	12.475	106.264
C	26	July	10.365	7.748	52.344
C	27	July	6.598	7.093	36.117
C	28	July	13.867	10.323	94.889
C	29	July	10.883	4.371	32.903
C	30	July	#N/A	#N/A	#N/A
C	31	July	9.324	5.029	23.615
C	32	July	11.796	7.409	44.838
C	33	July	8.841	7.637	36.595
C	34	July	5.006	2.699	7.771
C	35	July	10.835	7.805	46.804
C	36	July	12.893	10.437	82.629
C	37	July	12.017	9.028	61.302
C	38	July	#N/A	#N/A	#N/A
C	39	July	#N/A	#N/A	#N/A
C	40	July	8.622	7.225	40.766
C	41	July	10.825	4.826	30.532
C	42	July	6.433	3.97	15.748
A	1	Aug	#N/A	#N/A	#N/A
A	2	Aug	2.676	3.212	4.718
A	3	Aug	#N/A	#N/A	#N/A
A	4	Aug	#N/A	#N/A	#N/A
A	5	Aug	#N/A	#N/A	#N/A
A	6	Aug	#N/A	#N/A	#N/A
A	7	Aug	6.537	5.424	20.468
A	8	Aug	#N/A	#N/A	#N/A
A	9	Aug	6.332	3.977	18.974
A	10	Aug	7.106	4.795	25.781
A	11	Aug	6.98	5.487	25.048
A	12	Aug	#N/A	#N/A	#N/A
A	13	Aug	6.441	5.72	17.778
A	14	Aug	7.784	6.62	26.185
A	15	Aug	4.552	3.022	10.311
A	16	Aug	#N/A	#N/A	#N/A
A	17	Aug	#N/A	#N/A	#N/A
A	18	Aug	5.072	3.651	11.946
A	19	Aug	5.11	3.596	9.398
A	20	Aug	#N/A	#N/A	#N/A
A	21	Aug	5.696	3.455	13.4
A	22	Aug	5.547	3.358	13.576
A	23	Aug	4.733	4.115	10.253
A	24	Aug	#N/A	#N/A	#N/A
A	25	Aug	6.108	5.54	19.081
A	26	Aug	2.314	3.241	2.996
A	27	Aug	#N/A	#N/A	#N/A
A	28	Aug	#N/A	#N/A	#N/A
A	29	Aug	3.394	2.108	3.434
A	30	Aug	#N/A	#N/A	#N/A
A	31	Aug	6.224	3.825	13.23
A	32	Aug	7.075	5.438	23.119
A	33	Aug	1.631	1.159	0.983
A	34	Aug	4.88	2.628	7.949
A	35	Aug	5.627	3.329	12.844
A	36	Aug	#N/A	#N/A	#N/A
A	37	Aug	#N/A	#N/A	#N/A
A	38	Aug	#N/A	#N/A	#N/A
A	39	Aug	#N/A	#N/A	#N/A
A	40	Aug	4.899	3.446	10.614
A	41	Aug	#N/A	#N/A	#N/A
A	42	Aug	#N/A	#N/A	#N/A
B	1	Aug	9.89	6.206	36.151
B	2	Aug	7.26	4.006	19.06
B	3	Aug	10.165	5.333	34.498
B	4	Aug	#N/A	#N/A	#N/A
B	5	Aug	11.284	7.817	51.51
B	6	Aug	#N/A	#N/A	#N/A
B	7	Aug	#N/A	#N/A	#N/A
B	8	Aug	#N/A	#N/A	#N/A
B	9	Aug	10.87	7.26	56.467
B	10	Aug	6.295	4.072	14.228
B	11	Aug	8.87	5.154	27.53
B	12	Aug	#N/A	#N/A	#N/A
B	13	Aug	#N/A	#N/A	#N/A
B	14	Aug	9.579	7.328	46.702
B	15	Aug	10.592	7.028	46.802
B	16	Aug	9.685	8.477	47.822
B	17	Aug	6.809	5.447	19.935
B	18	Aug	#N/A	#N/A	#N/A
B	19	Aug	#N/A	#N/A	#N/A
B	20	Aug	6.597	3.719	18.895
B	21	Aug	10.636	6.673	50.638
B	22	Aug	8.737	8.381	45.528
B	23	Aug	#N/A	#N/A	#N/A
B	24	Aug	9.707	5.795	36.462
B	25	Aug	7.097	6.744	26.206
B	26	Aug	8.414	4.703	21.076
B	27	Aug	#N/A	#N/A	#N/A
B	28	Aug	7.797	8.281	35.38
B	29	Aug	#N/A	#N/A	#N/A
B	30	Aug	#N/A	#N/A	#N/A
B	31	Aug	#N/A	#N/A	#N/A
B	32	Aug	#N/A	#N/A	#N/A
B	33	Aug	8.781	6.086	35.611
B	34	Aug	8.975	4.476	29.052
B	35	Aug	10.505	6.378	43.357
B	36	Aug	#N/A	#N/A	#N/A
B	37	Aug	7.574	5.441	30.344
B	38	Aug	9.595	4.568	29.409
B	39	Aug	#N/A	#N/A	#N/A
B	40	Aug	8.595	4.249	23.586
B	41	Aug	#N/A	#N/A	#N/A
B	42	Aug	5.579	3.041	11.535
C	1	Aug	#N/A	#N/A	#N/A
C	2	Aug	11.396	7.435	50.669
C	3	Aug	#N/A	#N/A	#N/A
C	4	Aug	12.227	9.67	74.707
C	5	Aug	#N/A	#N/A	#N/A
C	6	Aug	#N/A	#N/A	#N/A
C	7	Aug	14.591	11.482	99.022
C	8	Aug	14.432	9.992	82.726
C	9	Aug	#N/A	#N/A	#N/A
C	10	Aug	11.633	9.995	76.259
C	11	Aug	#N/A	#N/A	#N/A
C	12	Aug	12.747	8.602	68.394
C	13	Aug	7.575	5.481	24.125
C	14	Aug	9.037	6.614	29.514
C	15	Aug	11.577	7.951	59.996
C	16	Aug	12.072	5.371	32.574
C	17	Aug	8.772	8.14	45.452
C	18	Aug	#N/A	#N/A	#N/A
C	19	Aug	#N/A	#N/A	#N/A
C	20	Aug	9.876	9.109	52.437
C	21	Aug	10.928	5.018	37.89
C	22	Aug	9.433	6.497	34.109
C	23	Aug	10.954	7.849	55.572
C	24	Aug	10.516	6.656	33.938
C	25	Aug	15.055	11.756	93.771
C	26	Aug	10.298	7.541	47.15
C	27	Aug	10.177	5.427	47.091
C	28	Aug	10.153	7.813	61.278
C	29	Aug	9.483	6.131	35.048
C	30	Aug	#N/A	#N/A	#N/A
C	31	Aug	9.369	4.474	24.545
C	32	Aug	11.953	7.09	49.488
C	33	Aug	5.854	2.628	11.459
C	34	Aug	4.761	2.056	6.506
C	35	Aug	9.529	7.661	51.655
C	36	Aug	14.505	11.939	98.292
C	37	Aug	12.866	8.521	70.938
C	38	Aug	#N/A	#N/A	#N/A
C	39	Aug	#N/A	#N/A	#N/A
C	40	Aug	9.402	6.747	40.727
C	41	Aug	10.203	4.313	26.381
C	42	Aug	5.927	5.615	16.683
A	1	Sept	#N/A	#N/A	#N/A
A	2	Sept	#N/A	#N/A	#N/A
A	3	Sept	#N/A	#N/A	#N/A
A	4	Sept	#N/A	#N/A	#N/A
A	5	Sept	#N/A	#N/A	#N/A
A	6	Sept	#N/A	#N/A	#N/A
A	7	Sept	8.02	6.334	33.816
A	8	Sept	#N/A	#N/A	#N/A
A	9	Sept	6.81	5.327	25.712
A	10	Sept	7.919	5.698	32.856
A	11	Sept	8.223	6.022	31.96
A	12	Sept	#N/A	#N/A	#N/A
A	13	Sept	7.107	6.498	22.031
A	14	Sept	#N/A	#N/A	#N/A
A	15	Sept	6.285	4.203	18.285
A	16	Sept	#N/A	#N/A	#N/A
A	17	Sept	#N/A	#N/A	#N/A
A	18	Sept	6.94	5.43	22.685
A	19	Sept	6.212	3.698	14.118
A	20	Sept	#N/A	#N/A	#N/A
A	21	Sept	6.676	4.817	19.992
A	22	Sept	5.769	4.29	18.019
A	23	Sept	7.065	3.834	18.246
A	24	Sept	#N/A	#N/A	#N/A
A	25	Sept	6.773	6.226	20.632
A	26	Sept	2.184	1.962	2.324
A	27	Sept	#N/A	#N/A	#N/A
A	28	Sept	#N/A	#N/A	#N/A
A	29	Sept	1.651	1.744	1.613
A	30	Sept	#N/A	#N/A	#N/A
A	31	Sept	7.895	4.076	21.787
A	32	Sept	8.336	5.796	33.118
A	33	Sept	#N/A	#N/A	#N/A
A	34	Sept	6.943	3.315	14.903
A	35	Sept	6.418	3.714	16.359
A	36	Sept	#N/A	#N/A	#N/A
A	37	Sept	#N/A	#N/A	#N/A
A	38	Sept	#N/A	#N/A	#N/A
A	39	Sept	#N/A	#N/A	#N/A
A	40	Sept	6.547	3.947	16.204
A	41	Sept	#N/A	#N/A	#N/A
A	42	Sept	#N/A	#N/A	#N/A
B	1	Sept	10.311	6.693	44.868
B	2	Sept	8.767	6.02	31.833
B	3	Sept	12.196	6.797	58.285
B	4	Sept	#N/A	#N/A	#N/A
B	5	Sept	13.184	9.319	85.959
B	6	Sept	#N/A	#N/A	#N/A
B	7	Sept	#N/A	#N/A	#N/A
B	8	Sept	#N/A	#N/A	#N/A
B	9	Sept	10.562	7.171	53.566
B	10	Sept	7.186	4.574	20.78
B	11	Sept	10.644	8.562	57.934
B	12	Sept	#N/A	#N/A	#N/A
B	13	Sept	#N/A	#N/A	#N/A
B	14	Sept	10.796	8.066	60.659
B	15	Sept	12.846	8.649	70.754
B	16	Sept	11.648	9.643	64.23
B	17	Sept	7.674	6.258	29.307
B	18	Sept	#N/A	#N/A	#N/A
B	19	Sept	#N/A	#N/A	#N/A
B	20	Sept	8.229	5.323	29.033
B	21	Sept	11.76	7.715	64.093
B	22	Sept	10.236	9.303	64.375
B	23	Sept	#N/A	#N/A	#N/A
B	24	Sept	11.184	8.175	57.215
B	25	Sept	10.194	9.375	52.591
B	26	Sept	9.258	6.635	36.78
B	27	Sept	#N/A	#N/A	#N/A
B	28	Sept	8.533	7.311	37.432
B	29	Sept	#N/A	#N/A	#N/A
B	30	Sept	#N/A	#N/A	#N/A
B	31	Sept	#N/A	#N/A	#N/A
B	32	Sept	#N/A	#N/A	#N/A
B	33	Sept	10.682	9.467	71.041
B	34	Sept	10.75	7.772	55.182
B	35	Sept	11.506	8.409	51.308
B	36	Sept	#N/A	#N/A	#N/A
B	37	Sept	9.616	6.905	49.029
B	38	Sept	11.203	6.44	43.778
B	39	Sept	#N/A	#N/A	#N/A
B	40	Sept	9.876	6.66	36.923
B	41	Sept	#N/A	#N/A	#N/A
B	42	Sept	8.189	5.279	26.528
C	1	Sept	#N/A	#N/A	#N/A
C	2	Sept	10.746	7.439	47.71
C	3	Sept	#N/A	#N/A	#N/A
C	4	Sept	13.644	9.075	90.774
C	5	Sept	#N/A	#N/A	#N/A
C	6	Sept	#N/A	#N/A	#N/A
C	7	Sept	9.366	4.812	23.429
C	8	Sept	14.63	10.445	84.052
C	9	Sept	#N/A	#N/A	#N/A
C	10	Sept	11.839	10.749	77.03
C	11	Sept	#N/A	#N/A	#N/A
C	12	Sept	14.24	9.369	79.47
C	13	Sept	10.247	6.334	42.405
C	14	Sept	10.597	7.521	46.944
C	15	Sept	14.152	9.422	88.521
C	16	Sept	9.599	4.96	26.696
C	17	Sept	7.952	5.878	28.375
C	18	Sept	#N/A	#N/A	#N/A
C	19	Sept	#N/A	#N/A	#N/A
C	20	Sept	10.335	9.371	58.418
C	21	Sept	12.277	8.462	66.294
C	22	Sept	10.035	7.002	40.024
C	23	Sept	15.623	9.575	100.874
C	24	Sept	10.251	8.226	40.535
C	25	Sept	14.093	11.183	90.601
C	26	Sept	11.274	8.769	62.923
C	27	Sept	8.411	7.575	46.808
C	28	Sept	10.037	9.721	61.565
C	29	Sept	12.601	5.126	43.382
C	30	Sept	#N/A	#N/A	#N/A
C	31	Sept	12.103	6.471	41.126
C	32	Sept	10.115	8.144	41.372
C	33	Sept	9.043	7.763	35.877
C	34	Sept	6.043	3.049	12.836
C	35	Sept	11.248	8.042	54.787
C	36	Sept	9.904	8.193	54.818
C	37	Sept	14.773	9.789	90.218
C	38	Sept	#N/A	#N/A	#N/A
C	39	Sept	#N/A	#N/A	#N/A
C	40	Sept	10.645	10.054	62.01
C	41	Sept	11.407	4.883	36.925
C	42	Sept	5.781	4.028	13.916
A	1	Oct	#N/A	#N/A	#N/A
A	2	Oct	#N/A	#N/A	#N/A
A	3	Oct	#N/A	#N/A	#N/A
A	4	Oct	#N/A	#N/A	#N/A
A	5	Oct	#N/A	#N/A	#N/A
A	6	Oct	#N/A	#N/A	#N/A
A	7	Oct	8.509	6.474	34.942
A	8	Oct	#N/A	#N/A	#N/A
A	9	Oct	#N/A	#N/A	#N/A
A	10	Oct	7.077	5.035	27.592
A	11	Oct	8.397	6.84	29.87
A	12	Oct	#N/A	#N/A	#N/A
A	13	Oct	7.157	6.955	25.538
A	14	Oct	#N/A	#N/A	#N/A
A	15	Oct	5.611	4.79	15.33
A	16	Oct	#N/A	#N/A	#N/A
A	17	Oct	#N/A	#N/A	#N/A
A	18	Oct	6.435	5.719	23.761
A	19	Oct	5.163	3.304	8.293
A	20	Oct	#N/A	#N/A	#N/A
A	21	Oct	7.64	4.899	21.777
A	22	Oct	5.855	4.846	18.044
A	23	Oct	7.848	5.479	23.278
A	24	Oct	#N/A	#N/A	#N/A
A	25	Oct	6.77	6.743	28.346
A	26	Oct	2.103	1.544	2.347
A	27	Oct	#N/A	#N/A	#N/A
A	28	Oct	#N/A	#N/A	#N/A
A	29	Oct	#N/A	#N/A	#N/A
A	30	Oct	#N/A	#N/A	#N/A
A	31	Oct	8.707	5.249	27.411
A	32	Oct	7.876	5.818	25.807
A	33	Oct	#N/A	#N/A	#N/A
A	34	Oct	5.894	3.507	11.608
A	35	Oct	6.518	2.984	13.693
A	36	Oct	#N/A	#N/A	#N/A
A	37	Oct	#N/A	#N/A	#N/A
A	38	Oct	#N/A	#N/A	#N/A
A	39	Oct	#N/A	#N/A	#N/A
A	40	Oct	#N/A	#N/A	#N/A
A	41	Oct	#N/A	#N/A	#N/A
A	42	Oct	#N/A	#N/A	#N/A
B	1	Oct	11.205	6.867	47.795
B	2	Oct	6.51	5.12	22.341
B	3	Oct	10.232	8.246	42.163
B	4	Oct	#N/A	#N/A	#N/A
B	5	Oct	11.713	8.139	61.434
B	6	Oct	#N/A	#N/A	#N/A
B	7	Oct	#N/A	#N/A	#N/A
B	8	Oct	#N/A	#N/A	#N/A
B	9	Oct	8.884	8.688	43.045
B	10	Oct	6.833	4.917	17.866
B	11	Oct	11.039	6.848	41.995
B	12	Oct	#N/A	#N/A	#N/A
B	13	Oct	#N/A	#N/A	#N/A
B	14	Oct	9.156	7.8	39.821
B	15	Oct	10.789	8.529	47.062
B	16	Oct	11.913	10.072	67.781
B	17	Oct	5.775	3.785	14.06
B	18	Oct	#N/A	#N/A	#N/A
B	19	Oct	#N/A	#N/A	#N/A
B	20	Oct	8.595	5.504	31.807
B	21	Oct	9.26	6.621	42.742
B	22	Oct	8.374	7.601	40.248
B	23	Oct	#N/A	#N/A	#N/A
B	24	Oct	11.083	8.301	48.227
B	25	Oct	7.904	7.664	32.772
B	26	Oct	8.318	6.081	29.771
B	27	Oct	#N/A	#N/A	#N/A
B	28	Oct	10.598	9.562	52.951
B	29	Oct	#N/A	#N/A	#N/A
B	30	Oct	#N/A	#N/A	#N/A
B	31	Oct	#N/A	#N/A	#N/A
B	32	Oct	#N/A	#N/A	#N/A
B	33	Oct	8.773	8.667	46.788
B	34	Oct	11.467	7.992	56.772
B	35	Oct	10.511	8.408	41.485
B	36	Oct	#N/A	#N/A	#N/A
B	37	Oct	9.727	6.936	49.941
B	38	Oct	11.226	5.656	40.481
B	39	Oct	#N/A	#N/A	#N/A
B	40	Oct	10.979	7.023	43.792
B	41	Oct	#N/A	#N/A	#N/A
B	42	Oct	8.868	5.831	34.397
C	1	Oct	#N/A	#N/A	#N/A
C	2	Oct	11.578	7.797	47.985
C	3	Oct	#N/A	#N/A	#N/A
C	4	Oct	10.926	9.695	53.064
C	5	Oct	#N/A	#N/A	#N/A
C	6	Oct	#N/A	#N/A	#N/A
C	7	Oct	10.59	4.44	28.378
C	8	Oct	11.724	9.772	65.7
C	9	Oct	#N/A	#N/A	#N/A
C	10	Oct	11.028	10.15	60.18
C	11	Oct	#N/A	#N/A	#N/A
C	12	Oct	14.303	9.527	79.726
C	13	Oct	11.334	7.506	49.898
C	14	Oct	12.557	8.714	51.625
C	15	Oct	14.272	9.469	83.047
C	16	Oct	9.827	5.612	34.302
C	17	Oct	10.75	7.757	43.375
C	18	Oct	#N/A	#N/A	#N/A
C	19	Oct	#N/A	#N/A	#N/A
C	20	Oct	8.595	9.221	53.891
C	21	Oct	13.548	9.449	82.837
C	22	Oct	10.452	7.088	42.802
C	23	Oct	14.855	10.264	91.982
C	24	Oct	9.312	7.82	30.889
C	25	Oct	14.569	10.974	90.765
C	26	Oct	12.065	8.912	62.757
C	27	Oct	9.562	7.056	36.942
C	28	Oct	11.516	10.558	66.004
C	29	Oct	13.896	5.993	50.908
C	30	Oct	#N/A	#N/A	#N/A
C	31	Oct	12.454	6.804	41.508
C	32	Oct	11.845	7.879	48.288
C	33	Oct	8.311	7.195	36.593
C	34	Oct	#N/A	#N/A	#N/A
C	35	Oct	12.536	9.372	58.99
C	36	Oct	14.709	11.729	80.003
C	37	Oct	14.11	10.123	84.978
C	38	Oct	#N/A	#N/A	#N/A
C	39	Oct	#N/A	#N/A	#N/A
C	40	Oct	11.134	9.504	65.005
C	41	Oct	11.981	6.316	41.37
C	42	Oct	9.416	5.349	26.158
A	1	Nov	#N/A	#N/A	#N/A
A	2	Nov	#N/A	#N/A	#N/A
A	3	Nov	#N/A	#N/A	#N/A
A	4	Nov	#N/A	#N/A	#N/A
A	5	Nov	#N/A	#N/A	#N/A
A	6	Nov	#N/A	#N/A	#N/A
A	7	Nov	9.572	6.781	37.023
A	8	Nov	#N/A	#N/A	#N/A
A	9	Nov	#N/A	#N/A	#N/A
A	10	Nov	8.417	6.815	40.392
A	11	Nov	#N/A	#N/A	#N/A
A	12	Nov	#N/A	#N/A	#N/A
A	13	Nov	7.965	9.003	39.115
A	14	Nov	#N/A	#N/A	#N/A
A	15	Nov	5.304	5.514	16.113
A	16	Nov	#N/A	#N/A	#N/A
A	17	Nov	#N/A	#N/A	#N/A
A	18	Nov	6.566	6.509	29.656
A	19	Nov	1.297	1.287	1.118
A	20	Nov	#N/A	#N/A	#N/A
A	21	Nov	7.494	5.368	23.139
A	22	Nov	6.857	5.026	20.894
A	23	Nov	6.525	4.083	12.986
A	24	Nov	#N/A	#N/A	#N/A
A	25	Nov	7.257	5.668	22.695
A	26	Nov	2.228	1.245	1.919
A	27	Nov	#N/A	#N/A	#N/A
A	28	Nov	#N/A	#N/A	#N/A
A	29	Nov	#N/A	#N/A	#N/A
A	30	Nov	#N/A	#N/A	#N/A
A	31	Nov	7.716	4.83	24.627
A	32	Nov	6.45	5.036	20.101
A	33	Nov	#N/A	#N/A	#N/A
A	34	Nov	6.713	4.335	15.989
A	35	Nov	5.009	2.038	5.891
A	36	Nov	#N/A	#N/A	#N/A
A	37	Nov	#N/A	#N/A	#N/A
A	38	Nov	#N/A	#N/A	#N/A
A	39	Nov	#N/A	#N/A	#N/A
A	40	Nov	7.04	4.493	17.746
A	41	Nov	#N/A	#N/A	#N/A
A	42	Nov	#N/A	#N/A	#N/A
B	1	Nov	10.748	4.873	34.018
B	2	Nov	#N/A	#N/A	#N/A
B	3	Nov	5.434	3.287	10.472
B	4	Nov	#N/A	#N/A	#N/A
B	5	Nov	12.728	8.919	72.613
B	6	Nov	#N/A	#N/A	#N/A
B	7	Nov	#N/A	#N/A	#N/A
B	8	Nov	#N/A	#N/A	#N/A
B	9	Nov	7.701	7.677	23.395
B	10	Nov	7.616	5.529	25.915
B	11	Nov	8.262	5.321	22.824
B	12	Nov	#N/A	#N/A	#N/A
B	13	Nov	#N/A	#N/A	#N/A
B	14	Nov	8.377	7.418	40.151
B	15	Nov	11.981	8.795	62.321
B	16	Nov	9.271	6.981	42.353
B	17	Nov	6.781	4.106	17.744
B	18	Nov	#N/A	#N/A	#N/A
B	19	Nov	#N/A	#N/A	#N/A
B	20	Nov	8.717	6.4	29.629
B	21	Nov	12.212	10.596	80.79
B	22	Nov	11.423	10.283	81.675
B	23	Nov	#N/A	#N/A	#N/A
B	24	Nov	13.065	10.076	86.562
B	25	Nov	9.019	5.666	32.653
B	26	Nov	5.59	5.517	16.904
B	27	Nov	#N/A	#N/A	#N/A
B	28	Nov	10.461	7.322	41.321
B	29	Nov	#N/A	#N/A	#N/A
B	30	Nov	#N/A	#N/A	#N/A
B	31	Nov	#N/A	#N/A	#N/A
B	32	Nov	#N/A	#N/A	#N/A
B	33	Nov	10.585	9.054	56.29
B	34	Nov	10.119	5.733	37.577
B	35	Nov	12.213	7.359	62.288
B	36	Nov	#N/A	#N/A	#N/A
B	37	Nov	9.277	9.079	50.737
B	38	Nov	13.893	7.71	69.431
B	39	Nov	#N/A	#N/A	#N/A
B	40	Nov	8.503	4.917	25.768
B	41	Nov	#N/A	#N/A	#N/A
B	42	Nov	6.917	4.443	18.801
C	1	Nov	#N/A	#N/A	#N/A
C	2	Nov	9.621	7.612	44.875
C	3	Nov	#N/A	#N/A	#N/A
C	4	Nov	11.662	8.987	54.272
C	5	Nov	#N/A	#N/A	#N/A
C	6	Nov	#N/A	#N/A	#N/A
C	7	Nov	10.768	4.899	29.46
C	8	Nov	#N/A	#N/A	#N/A
C	9	Nov	#N/A	#N/A	#N/A
C	10	Nov	12.429	12.377	88.323
C	11	Nov	#N/A	#N/A	#N/A
C	12	Nov	14.867	10.291	90.88
C	13	Nov	9.572	6.988	43.728
C	14	Nov	8.523	7.119	36.131
C	15	Nov	#N/A	#N/A	#N/A
C	16	Nov	1.827	1.323	2.104
C	17	Nov	#N/A	#N/A	#N/A
C	18	Nov	#N/A	#N/A	#N/A
C	19	Nov	#N/A	#N/A	#N/A
C	20	Nov	12.219	10.162	69.121
C	21	Nov	12.65	6.815	59.162
C	22	Nov	10.494	7.261	45.174
C	23	Nov	13.174	9.375	78.267
C	24	Nov	11.721	9.889	37.238
C	25	Nov	16.445	13.52	112.095
C	26	Nov	13.26	7.205	62.766
C	27	Nov	8.96	7.808	46.147
C	28	Nov	12.651	9.761	65.351
C	29	Nov	11.216	4.51	26.765
C	30	Nov	#N/A	#N/A	#N/A
C	31	Nov	10.524	4.915	32.181
C	32	Nov	11.572	7.742	48.88
C	33	Nov	10.475	7.833	42.406
C	34	Nov	2.775	2.663	4.601
C	35	Nov	12.255	8.961	63.693
C	36	Nov	10.88	12.833	67.589
C	37	Nov	14.746	8.242	85.467
C	38	Nov	#N/A	#N/A	#N/A
C	39	Nov	#N/A	#N/A	#N/A
C	40	Nov	8.975	5.439	33.314
C	41	Nov	11.232	5.653	35.878
C	42	Nov	7.909	5.098	25.649
A	1	Dec	#N/A	#N/A	#N/A
A	2	Dec	#N/A	#N/A	#N/A
A	3	Dec	#N/A	#N/A	#N/A
A	4	Dec	#N/A	#N/A	#N/A
A	5	Dec	#N/A	#N/A	#N/A
A	6	Dec	#N/A	#N/A	#N/A
A	7	Dec	9.078	5.719	29.336
A	8	Dec	#N/A	#N/A	#N/A
A	9	Dec	#N/A	#N/A	#N/A
A	10	Dec	8.897	6.621	39.019
A	11	Dec	#N/A	#N/A	#N/A
A	12	Dec	#N/A	#N/A	#N/A
A	13	Dec	10.149	8.509	54.759
A	14	Dec	#N/A	#N/A	#N/A
A	15	Dec	#N/A	#N/A	#N/A
A	16	Dec	#N/A	#N/A	#N/A
A	17	Dec	#N/A	#N/A	#N/A
A	18	Dec	6.907	6.365	29.617
A	19	Dec	2.378	1.991	2.325
A	20	Dec	#N/A	#N/A	#N/A
A	21	Dec	8.204	6.217	26.761
A	22	Dec	7.43	5.66	22.655
A	23	Dec	6.84	4.755	16.876
A	24	Dec	#N/A	#N/A	#N/A
A	25	Dec	6.832	6.08	20.864
A	26	Dec	2.399	1.243	1.987
A	27	Dec	#N/A	#N/A	#N/A
A	28	Dec	#N/A	#N/A	#N/A
A	29	Dec	#N/A	#N/A	#N/A
A	30	Dec	#N/A	#N/A	#N/A
A	31	Dec	8.779	6.024	35.477
A	32	Dec	7.113	6.462	21.794
A	33	Dec	#N/A	#N/A	#N/A
A	34	Dec	7.927	5.061	22.104
A	35	Dec	5.899	2.21	9.278
A	36	Dec	#N/A	#N/A	#N/A
A	37	Dec	#N/A	#N/A	#N/A
A	38	Dec	#N/A	#N/A	#N/A
A	39	Dec	#N/A	#N/A	#N/A
A	40	Dec	7.176	4.352	19.41
A	41	Dec	#N/A	#N/A	#N/A
A	42	Dec	#N/A	#N/A	#N/A
B	1	Dec	10.289	6.008	41.568
B	2	Dec	#N/A	#N/A	#N/A
B	3	Dec	8.883	8.799	41.03
B	4	Dec	#N/A	#N/A	#N/A
B	5	Dec	12.955	9.261	76.271
B	6	Dec	#N/A	#N/A	#N/A
B	7	Dec	#N/A	#N/A	#N/A
B	8	Dec	#N/A	#N/A	#N/A
B	9	Dec	#N/A	#N/A	#N/A
B	10	Dec	8.071	6.076	29.642
B	11	Dec	10.024	5.078	31.123
B	12	Dec	#N/A	#N/A	#N/A
B	13	Dec	#N/A	#N/A	#N/A
B	14	Dec	8.101	7.104	33.605
B	15	Dec	11.768	9.557	72.638
B	16	Dec	10.062	7.258	49.344
B	17	Dec	7.315	4.711	22.724
B	18	Dec	#N/A	#N/A	#N/A
B	19	Dec	#N/A	#N/A	#N/A
B	20	Dec	9.218	6.511	29.312
B	21	Dec	12.753	10.706	85.59
B	22	Dec	12.176	10.106	87.462
B	23	Dec	#N/A	#N/A	#N/A
B	24	Dec	13.088	9.901	87.395
B	25	Dec	10.053	6.184	43.895
B	26	Dec	5.714	5.528	18.192
B	27	Dec	#N/A	#N/A	#N/A
B	28	Dec	13.844	10.415	80.471
B	29	Dec	#N/A	#N/A	#N/A
B	30	Dec	#N/A	#N/A	#N/A
B	31	Dec	#N/A	#N/A	#N/A
B	32	Dec	#N/A	#N/A	#N/A
B	33	Dec	11.455	10.014	74.353
B	34	Dec	11.506	6.901	55.102
B	35	Dec	13.883	7.99	81.088
B	36	Dec	#N/A	#N/A	#N/A
B	37	Dec	12.065	10.34	71.848
B	38	Dec	13.154	8.529	71.953
B	39	Dec	#N/A	#N/A	#N/A
B	40	Dec	10.812	6.01	40.301
B	41	Dec	#N/A	#N/A	#N/A
B	42	Dec	8.695	6.075	35.254
C	1	Dec	#N/A	#N/A	#N/A
C	2	Dec	10.485	8.494	47.18
C	3	Dec	#N/A	#N/A	#N/A
C	4	Dec	12.016	8.186	54.428
C	5	Dec	#N/A	#N/A	#N/A
C	6	Dec	#N/A	#N/A	#N/A
C	7	Dec	10.876	4.682	30.397
C	8	Dec	#N/A	#N/A	#N/A
C	9	Dec	#N/A	#N/A	#N/A
C	10	Dec	13.503	13.297	105.222
C	11	Dec	#N/A	#N/A	#N/A
C	12	Dec	11.934	9.23	62.612
C	13	Dec	9.901	8.488	44.689
C	14	Dec	8.815	6.705	33.349
C	15	Dec	#N/A	#N/A	#N/A
C	16	Dec	1.905	1.861	2.162
C	17	Dec	#N/A	#N/A	#N/A
C	18	Dec	#N/A	#N/A	#N/A
C	19	Dec	#N/A	#N/A	#N/A
C	20	Dec	12.16	9.044	69.982
C	21	Dec	13.923	7.424	71.189
C	22	Dec	10.923	7.747	52.732
C	23	Dec	14.94	10.035	98.412
C	24	Dec	10.247	8.286	36.135
C	25	Dec	16.973	13.586	122.106
C	26	Dec	14.638	6.982	55.089
C	27	Dec	10.116	9.004	63.802
C	28	Dec	15.07	11.817	98.525
C	29	Dec	12.774	5.748	45.251
C	30	Dec	#N/A	#N/A	#N/A
C	31	Dec	11.717	6.439	39.424
C	32	Dec	12.477	8.453	58.309
C	33	Dec	8.545	10.051	37.661
C	34	Dec	6.505	2.929	12.582
C	35	Dec	12.255	8.961	63.693
C	36	Dec	13.199	13.018	92.977
C	37	Dec	15.067	7.252	74.425
C	38	Dec	#N/A	#N/A	#N/A
C	39	Dec	#N/A	#N/A	#N/A
C	40	Dec	9.086	5.908	33.887
C	41	Dec	13.538	7.036	55.466
C	42	Dec	9.222	5.027	26.885
